# Supplementary figures and images for: HMP-S7 Is a Novel Anti-Leukemic Peptide Discovered from Human Milk
Source: MDPI journal article supplement (doi:10.3390/biomedicines9080981), 2021-08-09

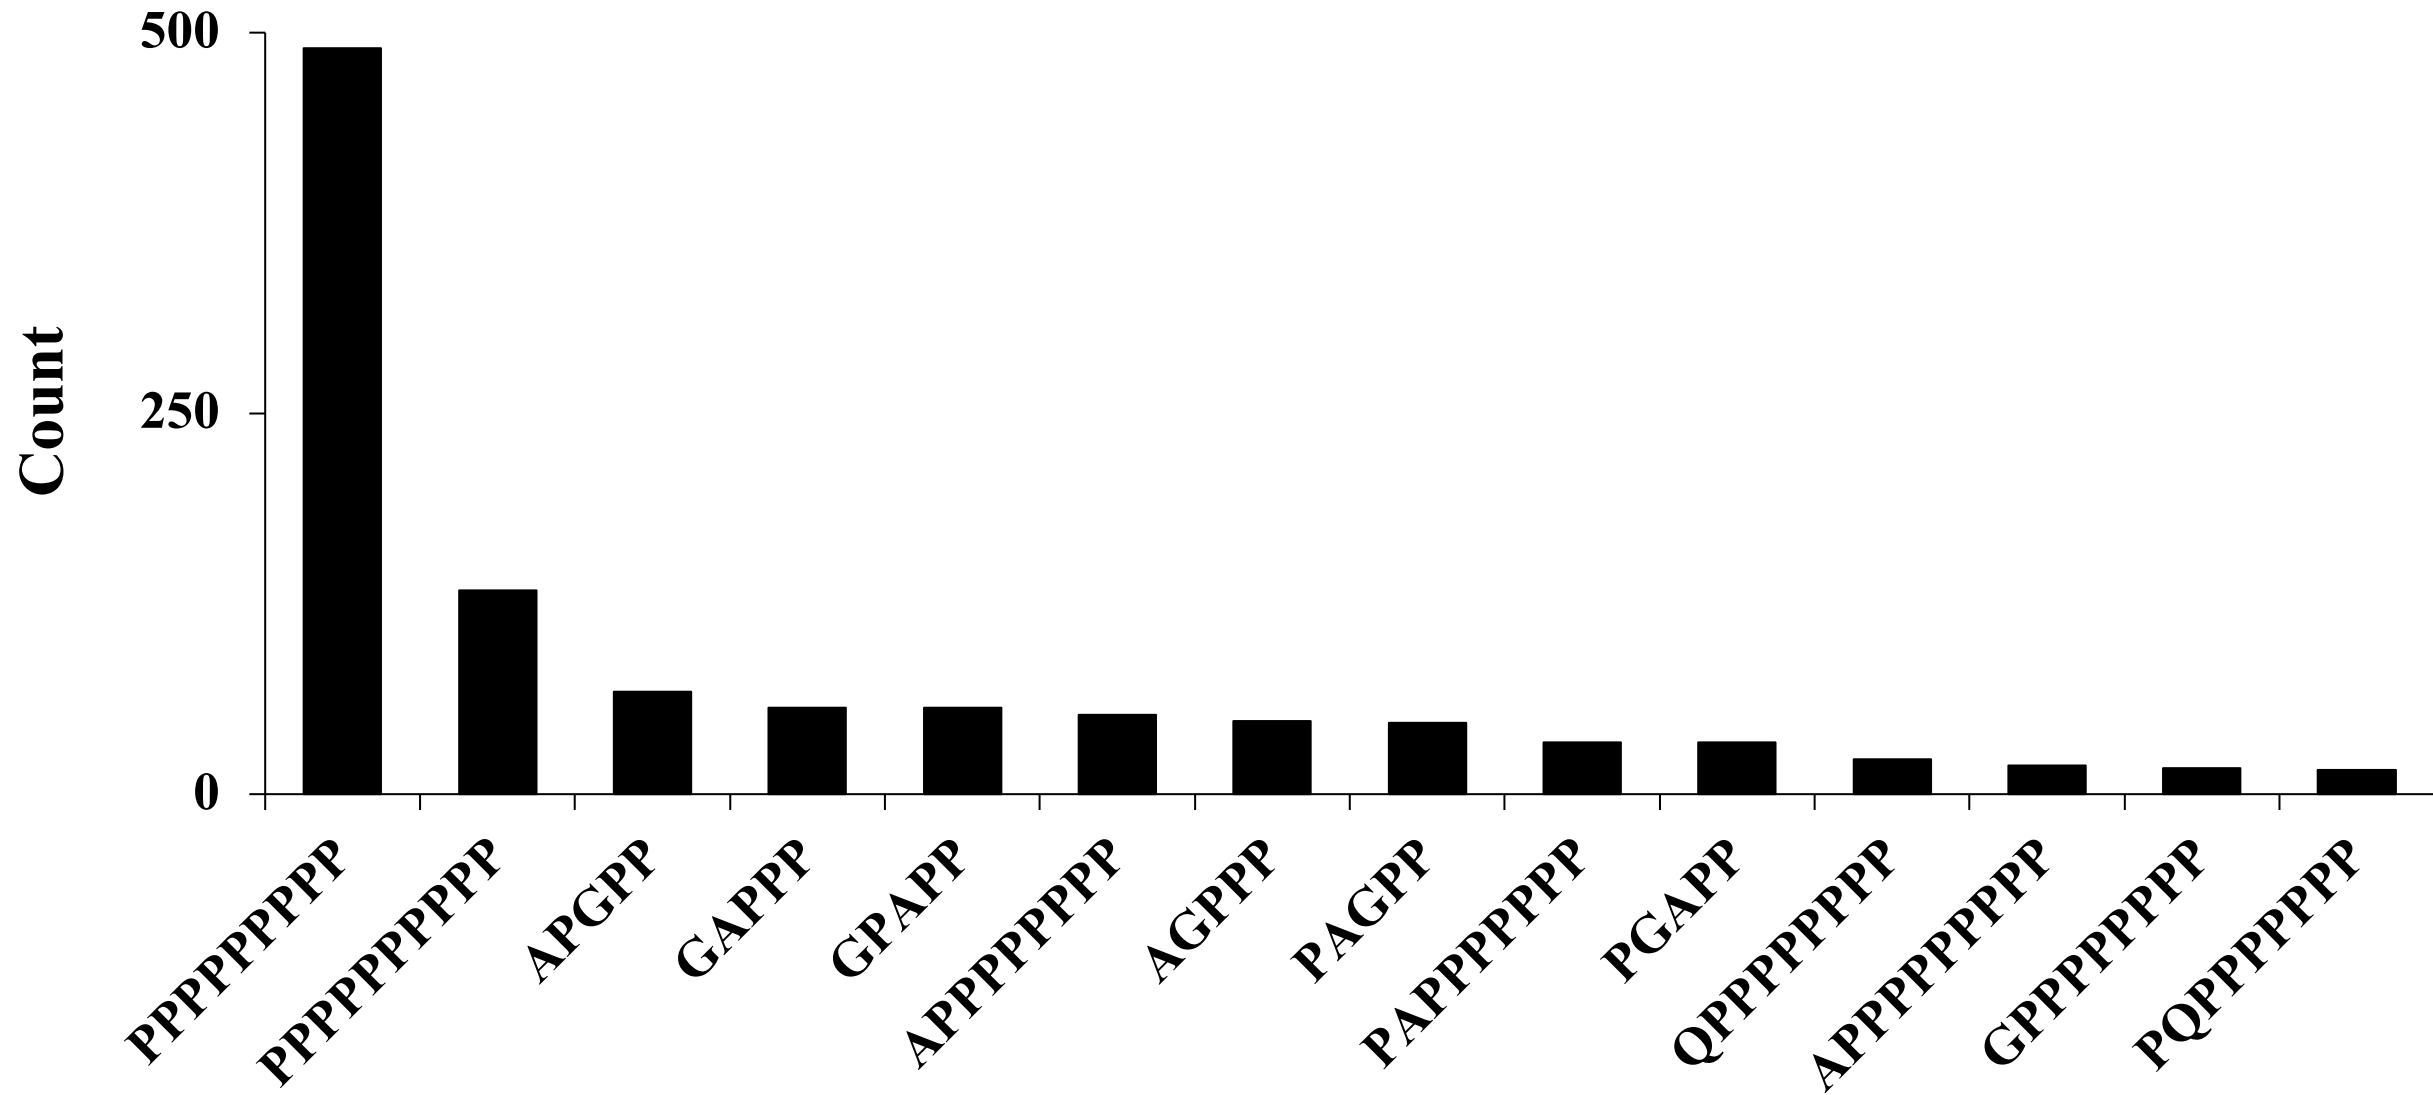

**Figure S1:** The frequency of the identified peptides with proline-rich sequences.

Supplement: s1 [file s1]
